# Supplementary material
Source: ML conference proceedings conference paper supplement (https://proceedings.mlr.press/v97/qian19c.html)
Supplement: Supplementary file [file qian19c-supp.pdf]

## Appendix: Proving Thm 1

In this appendix, we will prove Thm 1. We will start with a few lemmas:

**Lemma 1.1.** *Given assumptions 1 and 2 in Thm. 1,  $S_1$  is a deterministic one-to-one mapping of  $U_1$ ; so is  $S_2$  to  $U_2$ .*

The proof is obvious and omitted.

**Lemma 1.2.** *Given all the assumptions in Thm. 1. Then exist a asymptotic global minimizer of Eq. (5) that satisfies:*

1. 
$$\lim_{T \rightarrow \infty} \frac{1}{T} I(C_1; U_1) = 0 \quad (13)$$

where  $I(\cdot; \cdot)$  denotes mutual information.

2. 
$$\text{plim}_{T \rightarrow \infty} \hat{X}_{1 \rightarrow 1} = X_1 \quad (14)$$

3. 
$$\lim_{T \rightarrow \infty} \mathbb{E}[(\hat{X}_{1 \rightarrow 1} - X_1)^2] + \lambda \mathbb{E}[(E_c(\hat{X}_{1 \rightarrow 1}) - C_1)^2] = 0 \quad (15)$$

*Proof.* Define the following set

$$\mathcal{X} = \{x_1 : \log p_{X_1}(x_1|U_1) \leq n - 1 = n^* - 1 + T^{2/3}\} \quad (16)$$

$\mathcal{X}$  characterizes the set of instances where the optimal code length is guaranteed to be smaller than  $n$ .

Denote  $C_1 = E_c^*(X_1; T)$  as the the following coding scheme. When  $X_1 \in \mathcal{X}$ ,  $C_1$  is the optimal lossless code for  $p_{X_1}(\cdot|u_1)$  (whose code length is smaller than  $n$  by Shannon's Coding Theorem) padded with 0 to length  $n$ . When  $X_1 \notin \mathcal{X}$ ,  $C_1$  is any random number of dimension  $n$ .

Denote an auxiliary random variable

$$A_1 = \mathbb{1}[X_1 \in \mathcal{X}] \quad (17)$$

where  $\mathbb{1}[\cdot]$  denotes the indicator function.

When  $A_1 = 1$ , there is a one-to-one mapping from  $C_1$  to  $X_1$ , so we have

$$H(C_1|U_1, A_1 = 1) = H(X_1|U_1, A_1 = 1) \quad (18)$$

On the other hand, define  $h_m$  as the capacity of each dimension of  $C_1$ , i.e.

$$h_m = \max_{p_{C_{1i}}(\cdot)} H(C_{1i}) \quad (19)$$

Then, the information  $C_1$  contains is limited by the number of dimensions it has, i.e.

$$\begin{aligned} H(C_1) &\leq \sum_i H(C_{1i}) \leq n h_m \\ &\leq n^* h_m + T^{2/3} h_m \\ &\leq H(X_1|U_1) + 1 + T^{2/3} h_m \end{aligned} \quad (20)$$

where the second line is from assumption 3 of Thm. 1. The third line is from the Shannon's coding theorem.

Notice that  $A_1$  is a function of  $X_1$ , and thus we have

$$\begin{aligned} H(X_1|U_1) &= H(X_1, A_1|U_1) \\ &= H(X_1|U_1, A_1) + H(A_1|U_1) \\ &\leq H(X_1|U_1, A_1) + H(A_1) \\ &= H(X_1|U_1, A_1 = 1)p_{A_1}(1) \\ &\quad + H(X_1|U_1, A_1 = 0)p_{A_1}(0) + H(A_1) \\ &= H(C_1|U_1, A_1 = 1)p_{A_1}(1) \\ &\quad + H(X_1|U_1, A_1 = 0)p_{A_1}(0) + H(A_1) \\ &\leq H(C_1|U_1, A_1 = 1)p_{A_1}(1) \\ &\quad + H(C_1|U_1, A_1 = 0)p_{A_1}(0) \\ &\quad + H(X_1|U_1, A_1 = 0)p_{A_1}(0) + H(A_1) \\ &= H(C_1|U_1, A_1) \\ &\quad + H(X_1|U_1, A_1 = 0)p_{A_1}(0) + H(A_1) \\ &\leq H(C_1|U_1) \\ &\quad + H(X_1|U_1, A_1 = 0)p_{A_1}(0) + H(A_1) \end{aligned} \quad (21)$$

where the last but three line is given by Eq. (18).

Eqs. (20) and (21) imply that

$$\begin{aligned} I(C_1; U_1) &= H(C_1) - H(C_1|U_1) \\ &\leq 1 + T^{2/3} h_m \\ &\quad + H(X_1|U_1, A_1 = 0)p_{A_1}(0) + H(A_1) \end{aligned} \quad (22)$$

For any  $t \leq T$ ,  $X_1(t)$  is a discrete random variable with finite support cardinality, denoted as  $K$ . Then we have

$$\begin{aligned} H(X_1|U_1, A_1 = 0) &\leq \sum_{t=1}^T H(X_1(t)|U_1, A_1 = 0) \\ &\leq T \log K \end{aligned} \quad (23)$$

On the other hand, notice that  $\{X_1(t)\}$  is a stationary Markov process of order  $\tau$ . We have

$$\begin{aligned} \log p_{X_1}(\cdot|U_1) &= \sum_{t=1}^{\tau} \log p_{X_1(t)}(\cdot|U_1, X_1(1:t-1)) \\ &\quad + \sum_{t=\tau+1}^T \log p_{X_1(t)}(\cdot|U_1, X_1(t-\tau:t-1)) \end{aligned} \quad (24)$$

From the central limit theorem for ergodic Markov process

$$\lim_{T \rightarrow \infty} p_{A_1}(1) = 1, \quad \lim_{T \rightarrow \infty} p_{A_1}(0) = 0 \quad (25)$$

Combining Eqs. (22), (23) and (25), we have

$$\begin{aligned} \frac{1}{T}I(C_1; U_1) &\leq \frac{1}{T}(1 + T^{2/3}h_m + p_{A_1}(0)T \log K + H(A_1)) \\ &\rightarrow 0, \text{ as } T \rightarrow \infty \end{aligned} \quad (26)$$

Hence Eq. (13) is proved.

Next, for  $X_1 \in \mathcal{X}$ , notice that  $[C_1, S_1]$  is a lossless code of  $[X_1, U_1]$ , because

$$\begin{aligned} H(X_1, U_1) &= H(U_1) + H(X_1|U_1) \\ &= H(U_1) + H(C_1|U_1) \\ &= H(S_1) + H(C_1|S_1) \\ &= H(C_1, S_1) \end{aligned} \quad (27)$$

where the second line is from Eq (18); the third line is from Lem. 1.1. Eq. (27) implies that  $[U_1, X_1]$  is fully recoverable from  $[C_1, S_1]$ . Therefore, there exists an optimum decoder  $D^*(\cdot, \cdot)$  such that

$$\hat{X}_{1 \rightarrow 1} = X_1 \quad (28)$$

Combining Eqs. (25) and (28), Eq. (14) is proved.

Apply  $E_c(\cdot)$  to both sides, we get

$$\text{plim}_{T \rightarrow \infty} E_c(\hat{X}_{1 \rightarrow 1}) = E_c(X_1) = C_1 \quad (29)$$

Hence, considering  $X_1$  has finite second moment, convergence with probability implies mean squared convergence, *i.e.*

$$\lim_{T \rightarrow \infty} \mathbb{E}[\|\hat{X}_{1 \rightarrow 1} - X_1\|_2^2] + \lambda \mathbb{E}[\|E_c(\hat{X}_{1 \rightarrow 1}) - C_1\|_1] = 0 \quad (30)$$

which means that  $[E_c^*(\cdot), D^*(\cdot, \cdot)]$  is the asymptotic global optimizer of Eq. (5).  $\square$

Now we are ready to prove Thm 1.

*Proof.* (Thm. 1) Denote  $X'_2$  as speech drawn from the ground truth distribution of the converted speech, *i.e.*  $p_X(\cdot|U = U_2, Z = Z_1)$ . Then our goal is to show that  $\hat{X}_{1 \rightarrow 2}$  is asymptotically identically distributed to  $X'_2$ .

What we will do is bridge the two random variables by passing  $X'_2$  to AUTOVC for self-reconstruction. Namely,

$$C'_2 = E_c^*(X'_2), \text{ and } \hat{X}'_{2 \rightarrow 2} = D^*(C'_2, S_2) \quad (31)$$

where  $E^*(\cdot)$  and  $D(\cdot)$  are the optimal encoder and decoder derived in Lem. 1.2.

From Lem. 1.2, we know that  $\hat{X}'_{2 \rightarrow 2} \rightarrow X'_2$  with probability. So all is left to do is to show that  $\hat{X}'_{2 \rightarrow 2}$  is asymptotically identically distributed to  $\hat{X}_{1 \rightarrow 2}$ .

First, notice that

$$\begin{aligned} p_{C_1}(\cdot|z_1, u_2) &= p_{C_1}(\cdot|z_1) \\ &= p_{E_c(X_1)}(\cdot|z_1) \\ &= p_{E_c(X)}(\cdot|Z = z_1) \end{aligned} \quad (32)$$

where the first line is due to the fact that  $C_1$  and  $Z_1$  are both independent of  $U_2$  (Recall  $U_2$  is not involved in the generation process of  $C_1$ ); the last line is from the fact that  $(U_1, Z_1, X_1)$  is identically distributed to  $(U, Z, X)$ .

Therefore, we can show that

$$\begin{aligned} &\lim_{T \rightarrow \infty} \frac{1}{T} KL(p_{C'_2}(\cdot|z_1, u_2) \| p_{E_c(X)}(\cdot|Z = z_1)) \\ &= \lim_{T \rightarrow \infty} \frac{1}{T} KL(p_{C'_2}(\cdot|z_1, u_2) \| p_{C_1}(\cdot|Z = z_1)) \\ &= 0 \end{aligned} \quad (33)$$

where the last line is given by Eq. (13) of Lem. 1.2.

On the other hand,

$$\begin{aligned} p_{\hat{X}_{1 \rightarrow 2}}(\cdot|z_1, u_2) &= p_{D^*(C_1, S_2)}(\cdot|z_1, u_2) \\ p_{\hat{X}'_{2 \rightarrow 2}}(\cdot|z_1, u_2) &= p_{D^*(C'_2, S_2)}(\cdot|z_1, u_2) \end{aligned} \quad (34)$$

Combining Eqs. (33) and (34), we have

$$\lim_{T \rightarrow \infty} \frac{1}{T} KL(p_{\hat{X}_{1 \rightarrow 2}}(\cdot|z_1, u_2) \| p_{\hat{X}'_{2 \rightarrow 2}}(\cdot|z_1, u_2)) = 0 \quad (35)$$

Here is a final note on Thm 1. The content loss can help to constrain information capacity of the bottleneck by soft-constraining the range of each dimension of the content code, otherwise the information capacity of each bottleneck dimension can be unbounded and Thm 1 does not apply.  $\square$
